# Supplementary material
Source: publisher site journal article supplement (https://www.dovepress.com/article/434955)
Supplement: Supplementary file 1 [file get_supplementary_file.php]

Supplementary Table 1. The definition of the characteristics in the article

| Characteristic | Definition |
| --- | --- |
| Tumor morphology | a. Nodular type: Clear, well-defined lesions with smooth edges.  b. Nodular type with extrahepatic growth: Tumors extending beyond the expected margins of the nodules, with irregular edges or local extension of satellite nodules.  c. Fusion nodular type: Synchronous or metachronous nodules that have coalesced and resemble a single mass due to their proximity and growth. |
| Tumor size | The maximum diameter of the tumor was measured on portal venous phase images. |
| Arterial phase hyperenhancement | Enhancement of the entire or part of the tumor on arterial phase images, significantly higher than the liver, classified as a. Non-rim arterial phase hyperenhancement, b. No enhancement or rim arterial phase hyperenhancement. |
| Washout | Enhancement of the entire or part of the tumor on portal venous and delayed phase images is lower than the liver, classified as a. Non-washout, b. Non-rim washout, and c. Rim washout. |
| Radiological capsule smooth | Distinct enhancing border around the entire or part of the tumor on portal venous or delayed phase images, classified as a. No capsule, b. Partially complete capsule, and c. Complete capsule. |
| Rim enhancement | Crescent or polygonal enhancement is seen around the edge of the tumor on arterial phase images, appearing isointense on delayed phase images. |
| Mosaic appearance | Randomly distributed internal nodules or septations within the tumor, having different imaging characteristics. |
| Intralesional necrosis | The water-like signal is present within the tumor on T2-weighted images, with no enhancement on dynamic enhanced images, involving at least 20% of the tumor's largest cross-sectional diameter horizontally. |
| Intratumoral hypoperfusion | Presence of very mild enhancement within the tumor on both arterial phase and portal venous phase images, involving at least 20% of the maximum cross-sectional diameter of the tumor area. |
| Intratumoral hemorrhage | The presence of ill-defined high signal within the tumor or around the tumor on T1-weighted images without the use of biopsy, trauma, or intervention. The signal does not disappear on T1 fat-suppressed or T2-weighted images. |
| Intratumoral fat | The tumor demonstrates a slightly higher signal than liver tissue on T1-weighted in-phase images, and the signal is lost on T1-weighted out-of-phase images. |
| Satellite nodules | Small cancerous lesions (≤2cm) within 2cm of the tumor margin in the liver, separated from the tumor by liver tissue. |
| LI-RADS classification | a. LR-4: Indeterminate for hepatocellular carcinoma (HCC), meaning it could be HCC.  b. LR-5: Definite for hepatocellular carcinoma (HCC), indicating it is HCC.  c. LR-M: Probably or malignant, but not specific for hepatocellular carcinoma |

Supplementary Table 2. Univariate and multivariate Cox regression analysis results for ultra-early recurrence

| Variable | Univariate analysis | | Multivariable analysis | |
| --- | --- | --- | --- | --- |
| HR (95% CI) | p value | HR (95% CI) | p value |
| Sex |  |  |  |  |
| Male | Reference |  |  |  |
| Female | 0.740(0.310,1.766) | 0.497 |  |  |
| Age (> 46 years) | 0.329(0.175,0.619) | 0.001* | 0.270(0.136,0.533) | ＜0.001* |
| Cirrhosis | 1.246(0.607,2.557) | 0.549 |  |  |
| Hepatitis |  | 0.934 |  |  |
| No | Reference |  |  |  |
| HBsAg | 0.961(0.295,3.129) | 0.948 |  |  |
| HCsAg | 0.741(0.124,4.436) | 0.743 |  |  |
| AFP (> 332.4 ng/mL) | 5.210(2.751,9.866) | ＜0.001* | 4.432(2.278,8.621) | ＜0.001* |
| ALT (> 21 U/L) | 1.995(0.780,5.102) | 0.149 |  |  |
| AST (> 35 U/L) | 2.141(1.131,4.053) | 0.019* |  |  |
| ALT/AST (> 1.2) | 1.349(0.713,2.554) | 0.357 |  |  |
| GGT (> 51.2 U/L) | 3.910(1.856,8.237) | ＜0.001* | 2.981(1.335,6.658) | 0.008# |
| ALP (> 126 U/L) | 3.333(1.688,6.580) | 0.001* | 2.959(1.395,6.276) | 0.005# |
| TBIL (> 14.4 μmol/L) | 0.643(0.331,1.252) | 0.194 |  |  |
| DBIL (> 4.2 μmol/L) | 1.339(0.713,2.512) | 0.364 |  |  |
| PLT (> 134×10^9/L) | 2.452(1.082,5.556) | 0.032* |  |  |
| PT (> 12.8 s) | 2.258(1.160,4.394) | 0.017* | 2.431(1.228,4.812) | 0.011# |
| Child–Pugh |  |  |  |  |
| A | Reference |  |  |  |
| B | 1.954(0.471,8.107) | 0.356 |  |  |
| Morpholgy |  | 0.002* |  | 0.021# |
| Nodular | Reference |  | Reference |  |
| Extranodular growth | 2.172(1.045,4.516) | 0.038* | 2.219(1.040,4.738) | 0.039# |
| Confluent multinodular | 4.339(1.901,9.899) | ＜0.001* | 3.033(1.281,7.183) | 0.012# |
| Size (＞5 cm) | 2.142(1.138,4.034) | 0.018* |  |  |
| APHE |  |  |  |  |
| Non-rim APHE | Reference |  |  |  |
| Rim APHE | 1.442(0.636,3.267) | 0.380 |  |  |
| Washout |  | 0.957 |  |  |
| Non-washout | Reference |  |  |  |
| Non-rim washout | 0.906(0.321,2.556) | 0.851 |  |  |
| Rim washout | 0.774(0.142,4.228) | 0.768 |  |  |
| Enhancing capsule |  | 0.020* |  |  |
| No capsule | Reference |  |  |  |
| Partial complete capsule | 3.321(1.159,9.517) | 0.025* |  |  |
| Complete capsule | 1.489(0.459,4.836) | 0.507 |  |  |
| Corona enhancement | 1.696(0.905,3.178) | 0.099* |  |  |
| Mosaic architecture | 0.927(0.470,1.830) | 0.827 |  |  |
| Intratumor necrosis | 0.853(0.454,1.600) | 0.620 |  |  |
| Intratumor ischemia | 1.489(0.794,2.795) | 0.215 |  |  |
| Intratumor hemorrhage | 2.199(1.167,4.141) | 0.015* |  |  |
| Intratumor fat | 0.860(0.395,1.871) | 0.704 |  |  |
| Satellite lesion | 2.245(0.940,5.358) | 0.068* | 2.892(1.139,7.341) | 0.025# |
| LI-RADS category |  | 0.389 |  |  |
| LR-M | Reference |  |  |  |
| LR-4 | 0.269(0.033,2.184) | 0.219 |  |  |
| LR-5 | 0.665(0.293,1.511) | 0.330 |  |  |
| * referred to p<0.1 in univariate analysis;#referred to p<0.05 in multivariable analysis | | | | |
| AFP Alpha-fetoprotein, ALT Alanine aminotransferase, AST Aspartate aminotransferase,  GGT Gamma-glutamyl transpeptidase, ALP Alkaline phosphatase, TBIL Total Bilirubin, DBIL Direct Bilirubin，PLT Platelet count,  PT Prothrombin time, BCLC Barcelona clinic liver cancer, APHE arterial phase hyperenhancement, LI-RADS Liver Imaging Reporting and Data System | | | | |
